# Supplementary material
Source: MDPI journal article supplement (https://www.mdpi.com/1999-4907/13/8/1334)
Supplement: s1 [file s1]

**Figure S1. Habitat categories of the 5-ha forest plot at 10 m × 10 m scale.** The white color represents low-valleys (H1), the blue color represents mid-hillsides (H2), while the yellow color represents high-ridges (H3).

[illegible]

**Figure S2. Habitat categories of the 5-ha forest plot at 40 m × 40 m scale.** The white color represents low-valleys (H1), the blue color represents mid-hillsides (H2), while the yellow color represents high-ridges (H3).

|    |    |    |    |    |    |    |    |    |
|----|----|----|----|----|----|----|----|----|
| H2 | H1 |    | H1 | H1 |    | H2 | H3 |    |
| H2 | /  | H1 |    | H1 |    | H2 | /  | H3 |
| H2 | H1 |    | H1 |    | /  | H2 | /  | H3 |
| H2 | H1 |    | H1 |    |    | H2 |    | H3 |
| H2 | H1 |    | H1 |    |    | H2 |    | H3 |
| H2 | H1 |    | H1 |    | H2 | H3 |    |    |
